# Supplementary material for: Pyruvate dehydrogenase kinase 1 is essential for transplantable mouse bone marrow hematopoietic stem cell and progenitor function
Source: PubMed Central journal article supplement (PMC5300157; doi:10.1371/journal.pone.0171714), 2017-02-09
Supplement: pone.0171714.s004.pdf [file pone.0171714.s004.pdf]

| <i>Primer name</i>                             | <i>Sequence 5'→3'</i>   |
|------------------------------------------------|-------------------------|
| Forward primer Mx1:Cre                         | CATGTGTCTTGGTGGGCTGAG   |
| Reverse primer Mx1:Cre                         | CGCATAACCAGTGAAACAGCAT  |
| Forward primer Hif-1 $\alpha^{\text{lox/lox}}$ | CGTGTGAGAAAACCTTCTGGATG |
| Reverse primer Hif-1 $\alpha^{\text{lox/lox}}$ | AAAAGTATTGTGTTGGGGCAGT  |
| Forward primer Hif-1 $\alpha^{\Delta/\Delta}$  | GCAGTTAAGAGCACTAGTTG    |
| Reverse primer Hif-1 $\alpha^{\Delta/\Delta}$  | TTGGGGATGAAAACATCTGC    |
