# Supplementary material for: Pyruvate dehydrogenase kinase 1 is essential for transplantable mouse bone marrow hematopoietic stem cell and progenitor function
Source: PubMed Central journal article supplement (PMC5300157; doi:10.1371/journal.pone.0171714), 2017-02-09
Supplement: pone.0171714.s005.pdf [file pone.0171714.s005.pdf]

| <i>Primer name</i>            | <i>Sequence 5'→3'</i>    |
|-------------------------------|--------------------------|
| Forward primer Hif-1 $\alpha$ | TGACGGCGACAGGGTTTACA     |
| Reverse primer Hif-1 $\alpha$ | AATATGGCCCGTGCAGTGAA     |
| Forward primer Pdk1           | TCCCCGATTCAGGTTAC        |
| Reverse primer Pdk1           | CCCGGTCACTCATCTTCACA     |
| Forward primer Pdk2           | CACCGGACTCTAAGCCAGTT     |
| Reverse primer Pdk2           | ACGGGGTCATCTCCATAGGT     |
| Forward primer Pdk3           | GGGTACCGATGCAGTCATTTA    |
| Reverse primer Pdk3           | GCTTCAGGAGTGGTCTTGTAAT   |
| Forward primer Glut1          | TCACTGTGGTGTCGCTGTTT     |
| Reverse primer Glut1          | CCATGGAATAGGACCAGGGC     |
| Forward primer $\beta$ -actin | GCTGTATTCCCCTCCATCGTG    |
| Reverse primer $\beta$ -actin | CACGGTTGGCCTTAGGGTTCAG   |
| Forward primer Hprt           | GGCCAGACTTTGTTGGATTTG    |
| Reverse primer Hprt           | CGCTCATCTTAGGCTTTGTATTTG |
