# Supplementary material for: Pyruvate dehydrogenase kinase 1 is essential for transplantable mouse bone marrow hematopoietic stem cell and progenitor function
Source: PubMed Central journal article supplement (PMC5300157; doi:10.1371/journal.pone.0171714), 2017-02-09
Supplement: pone.0171714.s006.pdf [file pone.0171714.s006.pdf]

| <i>Probe name</i> | <i>Assay ID</i> |
|-------------------|-----------------|
| Hprt              | Mm00446968_m1   |
| Pdk1              | Mm00554306_m1   |
| Pdk2              | Mm00446681_m1   |
| Pdk3              | Mm00455220_m1   |
| Pdk4              | Mm01166879_m1   |
| Hk2               | Mm00443385_m1   |
| Ldha              | Mm01612132_g1   |
| Pgk1              | Mm00435617_m1   |
