# Supplementary material for: Pyruvate dehydrogenase kinase 1 is essential for transplantable mouse bone marrow hematopoietic stem cell and progenitor function
Source: PubMed Central journal article supplement (PMC5300157; doi:10.1371/journal.pone.0171714), 2017-02-09
Supplement: pone.0171714.s007.pdf [file pone.0171714.s007.pdf]

| shDNA          | Sequence                                                       | TRC number     |
|----------------|----------------------------------------------------------------|----------------|
| Hif-1 $\alpha$ | CCGGCCAGTTACGATTGTGAAGTTACTCGAG<br>TAACTTCACAATCGTAACTGGTTTTTG | TRCN0000054450 |
| Pdk1.11        | CCGGGCGGCTTTGTGATTTGTATTACTCGAGT<br>AATACAAATCACAAAGCCGTTTTTG  | TRCN0000078811 |
| Pdk1.12        | GGCTTTGTGATTTGTATTATCTCGAGATAATA<br>CAAATCACAAAGCCGTTTTTG      | TRCN0000078812 |
| Scramble       | CCGGCCTAAGGTTAAGTCGCCCTCGCGAGGG<br>CGACTTAACCTTAGGTTTTG        | SHC002         |
